# Supplementary material
Source: ML conference proceedings conference paper supplement (https://openreview.net/forum?id=9C4gVbPqSy)

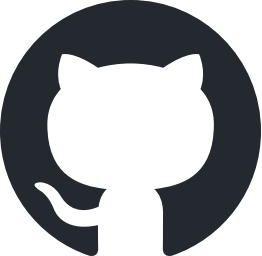

Supplement: supplementary_material [file github-logo.pdf › files/github-logo.pdf]
